# Supplementary material for: Development of the Central Dogma Concept Inventory (CDCI) Assessment Tool
Source: Atypon-hosted journal article supplement (doi:10.1187/cbe.15-06-0124), 2016-04-08
Supplement: combinedsupmats.pdf [file combinedsupmats.pdf]

# Supplemental Material

*CBE—Life Sciences Education*

Newman *et al.*

| <b>Question</b> | <b><i>P</i></b> | <b><i>D</i></b> | <b><math>r_{pb}</math></b> |
|-----------------|-----------------|-----------------|----------------------------|
| Q1A             | 0.78            | 0.30            | 0.27                       |
| Q1B             | 0.64            | 0.39            | 0.29                       |
| Q1C             | 0.85            | 0.05            | 0.09                       |
| Q1D             | 0.47            | 0.49            | 0.47                       |
| Q1E             | 0.88            | 0.19            | 0.19                       |
| Q2A             | 0.85            | -0.69           | 0.27                       |
| Q2B             | 0.80            | 0.38            | 0.32                       |
| Q2C             | 0.90            | 0.12            | 0.15                       |
| Q2D             | 0.76            | 0.18            | 0.23                       |
| Q2E             | 0.54            | 0.59            | 0.48                       |
| Q3A             | 0.87            | 0.21            | 0.22                       |
| Q3B             | 0.59            | 0.03            | 0.11                       |
| Q3C             | 0.77            | 0.23            | 0.24                       |
| Q4A             | 0.90            | 0.17            | 0.20                       |
| Q4B             | 0.83            | -0.02           | -0.05                      |
| Q4C             | 0.44            | -0.16           | -0.02                      |
| Q5A             | 0.64            | 0.04            | 0.06                       |
| Q5B             | 0.60            | 0.01            | 0.04                       |
| Q5C             | 0.56            | -0.12           | -0.05                      |
| Q5D             | 0.33            | 0.22            | 0.23                       |
| Q6A             | 0.86            | 0.27            | 0.30                       |
| Q6B             | 0.78            | 0.33            | 0.34                       |
| Q6C             | 0.70            | 0.24            | 0.25                       |
| Q6D             | 0.60            | 0.27            | 0.26                       |
| Q7A             | 0.63            | 0.38            | 0.37                       |
| Q7B             | 0.75            | 0.23            | 0.27                       |
| Q7C             | 0.74            | 0.25            | 0.27                       |
| Q7D             | 0.76            | 0.15            | 0.22                       |
| Q8A             | 0.72            | 0.13            | 0.17                       |
| Q8B             | 0.69            | 0.32            | 0.36                       |
| Q8C             | 0.43            | 0.52            | 0.45                       |
| Q8D             | 0.70            | -0.07           | 0.01                       |
| Q9A             | 0.90            | 0.24            | 0.26                       |
| Q9B             | 0.77            | 0.21            | 0.25                       |
| Q9C             | 0.27            | 0.20            | 0.25                       |
| Q9D             | 0.92            | 0.17            | 0.20                       |
| Q10A            | 0.65            | 0.23            | 0.25                       |
| Q10B            | 0.73            | 0.41            | 0.39                       |
| Q10C            | 0.77            | 0.24            | 0.25                       |
| Q11A            | 0.84            | -0.61           | 0.36                       |
| Q11B            | 0.91            | -0.80           | 0.24                       |
| Q11C            | 0.75            | 0.19            | 0.28                       |

|      |      |       |       |
|------|------|-------|-------|
| Q11D | 0.63 | 0.21  | 0.31  |
| Q12A | 0.57 | 0.34  | 0.29  |
| Q12B | 0.90 | 0.18  | 0.26  |
| Q12C | 0.35 | 0.05  | 0.09  |
| Q12D | 0.93 | 0.01  | 0.00  |
| Q12E | 0.66 | 0.15  | 0.16  |
| Q13A | 0.92 | 0.00  | 0.04  |
| Q13B | 0.54 | 0.14  | 0.15  |
| Q13C | 0.32 | 0.31  | 0.25  |
| Q13D | 0.20 | 0.09  | 0.12  |
| Q13E | 0.80 | 0.06  | 0.08  |
| Q14A | 0.79 | 0.25  | 0.24  |
| Q14B | 0.50 | 0.16  | 0.18  |
| Q14C | 0.83 | 0.22  | 0.29  |
| Q14D | 0.68 | 0.31  | 0.28  |
| Q15A | 0.63 | 0.22  | 0.27  |
| Q15B | 0.75 | 0.42  | 0.37  |
| Q15C | 0.79 | 0.35  | 0.33  |
| Q15D | 0.65 | 0.57  | 0.49  |
| Q16A | 0.71 | 0.15  | 0.24  |
| Q16B | 0.64 | 0.27  | 0.31  |
| Q16C | 0.79 | 0.13  | 0.20  |
| Q16D | 0.90 | 0.11  | 0.16  |
| Q17A | 0.65 | -0.13 | -0.04 |
| Q17B | 0.89 | 0.18  | 0.26  |
| Q17C | 0.60 | 0.31  | 0.28  |
| Q17D | 0.63 | 0.42  | 0.35  |
| Q17E | 0.86 | -0.01 | -0.01 |
| Q18A | 0.93 | 0.07  | 0.14  |
| Q18B | 0.55 | 0.59  | 0.49  |
| Q18C | 0.80 | 0.22  | 0.30  |
| Q18D | 0.76 | 0.29  | 0.28  |
| Q19A | 0.60 | 0.60  | 0.52  |
| Q19B | 0.78 | 0.25  | 0.31  |
| Q19C | 0.68 | 0.29  | 0.34  |
| Q20A | 0.80 | 0.32  | 0.35  |
| Q20B | 0.57 | 0.19  | 0.22  |
| Q20C | 0.71 | 0.14  | 0.19  |
| Q20D | 0.84 | 0.10  | 0.16  |
| Q21A | 0.80 | 0.13  | 0.19  |
| Q21B | 0.71 | 0.49  | 0.41  |
| Q21C | 0.77 | 0.39  | 0.40  |
| Q22A | 0.93 | 0.10  | 0.21  |

|      |      |       |      |
|------|------|-------|------|
| Q22B | 0.74 | 0.19  | 0.26 |
| Q22C | 0.64 | 0.46  | 0.43 |
| Q22D | 0.94 | -0.82 | 0.24 |
| Q23A | 0.85 | 0.28  | 0.32 |
| Q23B | 0.31 | 0.17  | 0.24 |
| Q23C | 0.41 | 0.04  | 0.10 |
| Q23D | 0.40 | 0.07  | 0.15 |
| Q24A | 0.53 | 0.30  | 0.32 |
| Q24B | 0.73 | 0.34  | 0.36 |
| Q24C | 0.65 | 0.39  | 0.36 |
| Q24D | 0.81 | 0.30  | 0.28 |
